# Supplementary material for: A Heavy Metal-Associated Protein (AcHMA1) from the Halophyte, Atriplex canescens (Pursh) Nutt., Confers Tolerance to Iron and Other Abiotic Stresses When Expressed in Saccharomyces cerevisiae
Source: MDPI journal article supplement (doi:10.3390/ijms150814891), 2014-08-22
Supplement: s1 [file s1]

## Supplementary Information

**Figure S1.** Phylogenetic analysis of the heavy metal associated proteins from different plants. The unrooted Neighbor-Joining tree was constructed employing the MEGA4.0 software. Bootstrap values (percentages) higher than 50% (1000 replicates) are given at nodes. Branch length in the tree is proportional to the numbers of nucleotide substitutions as measured by the scale bar (1% sequence divergence). The *AcHMAI* described in this study is marked with triangle.

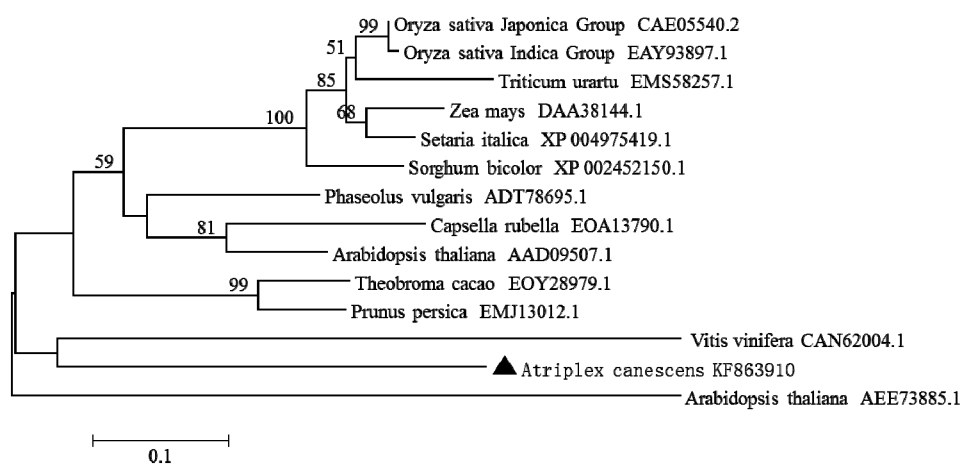

**Figure S2.** Metal stress response analysis of *AcHMAI*-overexpressing yeast cells. Growth of yeast cells expressing *AcHMAI* and the pYES2 in the medium supplemented with 1.5 mM  $Pb^{2+}$ , 5 mM  $Cd^{2+}$ , 10 mM  $Ni^{2+}$ , 10 mM  $Mn^{2+}$ , 15 mM  $Co^{2+}$ , 15 mM  $Zn^{2+}$ , 5 mM  $Cu^{2+}$  and 10 mM  $Cu^{2+}$ .

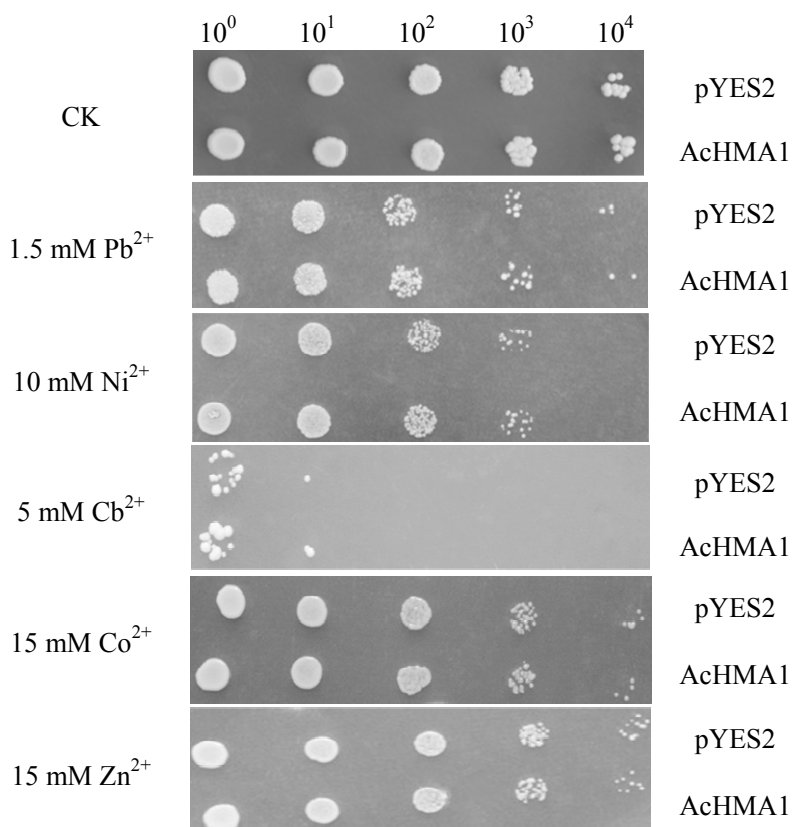

Figure S2. *Cont.*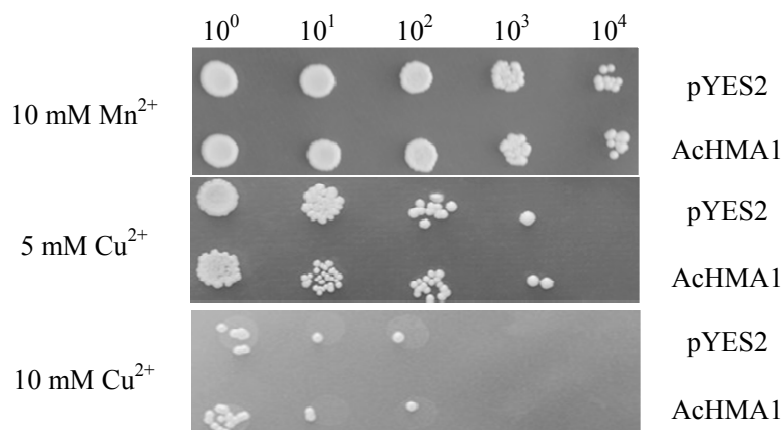

Table S1. Pair of primers of salt resistance-related genes and reference gene for quantitative RT-PCR.

| Accession No. | Genes Description              | Forward Primers            | Reverse Primers            |
|---------------|--------------------------------|----------------------------|----------------------------|
| KF86390       | heavy metal associated protein | 5'-AGAGGTTACCAAGGGGTGGA-3' | 5'-CAGTAATTGGGCGTTTCGGC-3' |
| KJ027085      | EF1a                           | 5'-CCCCAGTTCTCGACTGTCAC-3' | 5'-TGGTGGGAACCATCTTCACG-3' |
